# Supplementary material
Source: Elsevier journal article supplement (https://comptes-rendus.academie-sciences.fr/chimie/article/10.1016/j.crci.2012.04.003/file/attach/mmc3.pdf)

# checkCIF/PLATON report

No syntax errors found.    CIF dictionary    Interpreting this report

## Datablock: jml51

---

Bond precision:    C-C = 0.0053 Å                      Wavelength=0.71073

Cell:                a=14.2679(17)        b=22.150(3)            c=16.5298(14)  
                      alpha=90            beta=115.124(8)        gamma=90

Temperature:        200 K

|                        | Calculated           | Reported             |
|------------------------|----------------------|----------------------|
| Volume                 | 4729.7(10)           | 4729.8(9)            |
| Space group            | P 21/n               | P 21/n               |
| Hall group             | -P 2yn               | -P 2yn               |
| Moiety formula         | C88 H118 Mn6 N12 O22 | C88 H118 Mn6 N12 O22 |
| Sum formula            | C88 H118 Mn6 N12 O22 | C88 H118 Mn6 N12 O22 |
| Mr                     | 2025.59              | 2025.58              |
| Dx,g cm <sup>-3</sup>  | 1.422                | 1.422                |
| Z                      | 2                    | 2                    |
| Mu (mm <sup>-1</sup> ) | 0.852                | 0.852                |
| F000                   | 2112.0               | 2112.0               |
| F000'                  | 2116.85              |                      |
| h,k,lmax               | 20,31,23             | 20,31,23             |
| Nref                   | 13788                | 13721                |
| Tmin,Tmax              | 0.799,0.829          | 0.562,0.894          |
| Tmin'                  | 0.795                |                      |

Correction method= MULTI-SCAN

Data completeness= 0.995                      Theta(max)= 30.000

R(reflections)= 0.0457( 7986)                wR2(reflections)= 0.1387( 13721)

S = 1.010                                      Npar= 647

---

The following ALERTS were generated. Each ALERT has the format

**test-name\_ALERT\_alert-type\_alert-level.**

Click on the hyperlinks for more details of the test.

---

### Alert level B

|                   |                           |                                  |                   |        |      |            |
|-------------------|---------------------------|----------------------------------|-------------------|--------|------|------------|
| PLAT220_ALERT_2_B | Large Non-Solvent         | C                                | Ueq(max)/Ueq(min) | ...    | 4.81 | Ratio      |
| PLAT230_ALERT_2_B | Hirshfeld Test            | Diff for                         | N6                | -- C33 | ..   | 10.06 su   |
| PLAT242_ALERT_2_B | Check Low                 | Ueq as Compared to Neighbors for |                   |        |      | C44A       |
| PLAT242_ALERT_2_B | Check Low                 | Ueq as Compared to Neighbors for |                   |        |      | N4B        |
| PLAT245_ALERT_2_B | U(iso) H44A               | Smaller than U(eq)               | C45B              | by     | ...  | 0.08 AngSq |
| PLAT410_ALERT_2_B | Short Intra H...H Contact | H17                              | ..                | H20D   | ..   | 1.81 Ang.  |

● **Alert level C**

|                   |                            |                                  |            |
|-------------------|----------------------------|----------------------------------|------------|
| PLAT215_ALERT_3_C | Disordered C44B            | has ADP max/min Ratio .....      | 3.50       |
| PLAT215_ALERT_3_C | Disordered C45B            | has ADP max/min Ratio .....      | 3.20       |
| PLAT222_ALERT_3_C | Large Non-Solvent          | H Uiso(max)/Uiso(min) ...        | 4.52 Rati  |
| PLAT230_ALERT_2_C | Hirshfeld Test Diff for    | C33 -- C34 ..                    | 5.13 su    |
| PLAT241_ALERT_2_C | Check High                 | Ueq as Compared to Neighbors for | C40        |
| PLAT242_ALERT_2_C | Check Low                  | Ueq as Compared to Neighbors for | O11        |
| PLAT242_ALERT_2_C | Check Low                  | Ueq as Compared to Neighbors for | N4A        |
| PLAT242_ALERT_2_C | Check Low                  | Ueq as Compared to Neighbors for | C20A       |
| PLAT242_ALERT_2_C | Check Low                  | Ueq as Compared to Neighbors for | C35        |
| PLAT242_ALERT_2_C | Check Low                  | Ueq as Compared to Neighbors for | C45A       |
| PLAT242_ALERT_2_C | Check Low                  | Ueq as Compared to Neighbors for | C20B       |
| PLAT245_ALERT_2_C | U(iso) H44B                | Smaller than U(eq) C44B by ...   | 0.05 AngSq |
| PLAT245_ALERT_2_C | U(iso) H45A                | Smaller than U(eq) C45B by ...   | 0.02 AngSq |
| PLAT245_ALERT_2_C | U(iso) H45B                | Smaller than U(eq) C45B by ...   | 0.02 AngSq |
| PLAT360_ALERT_2_C | Short C(sp3)-C(sp3) Bond   | C33 - C34 ...                    | 1.41 Ang.  |
| PLAT234_ALERT_4_C | Large Hirshfeld Difference | N4A -- C20A ..                   | 0.15 Ang.  |

● **Alert level G**

|                   |                                                 |             |
|-------------------|-------------------------------------------------|-------------|
| PLAT301_ALERT_3_G | Note: Main Residue Disorder .....               | 10.00 Perc. |
| PLAT860_ALERT_3_G | Note: Number of Least-Squares Restraints .....  | 10          |
| PLAT128_ALERT_4_G | Alternate Setting of Space-group P21/c .....    | P21/n       |
| PLAT779_ALERT_4_G | Suspect or Irrelevant (Bond) Angle in CIF ..... | 21.70 Deg.  |
|                   | C44B -O11 -C44A 1.555 1.555 1.555               |             |
| PLAT779_ALERT_4_G | Suspect or Irrelevant (Bond) Angle in CIF ..... | 37.00 Deg.  |
|                   | N4B -C19 -N4A 1.555 1.555 1.555                 |             |

- 0 **ALERT level A** = In general: serious problem
- 7 **ALERT level B** = Potentially serious problem
- 16 **ALERT level C** = Check and explain
- 5 **ALERT level G** = General alerts; check

- 0 ALERT type 1 CIF construction/syntax error, inconsistent or missing data
- 19 ALERT type 2 Indicator that the structure model may be wrong or deficient
- 5 ALERT type 3 Indicator that the structure quality may be low
- 4 ALERT type 4 Improvement, methodology, query or suggestion
- 0 ALERT type 5 Informative message, check

### Publication of your CIF in IUCr journals

**A basic structural check has been run on your CIF. These basic checks will be run on all CIFs submitted for publication in IUCr journals (*Acta Crystallographica*, *Journal of Applied Crystallography*, *Journal of Synchrotron Radiation*); however, if you intend to submit to *Acta Crystallographica Section C* or *E*, you should make sure that full publication checks are run on the final version of your CIF prior to submission.**

### Publication of your CIF in other journals

**Please refer to the *Notes for Authors* of the relevant journal for any special instructions relating to CIF submission.**

PLATON version of 29/06/2010; check.def file version of 26/06/2010

Datablock jml51 - ellipsoid plot

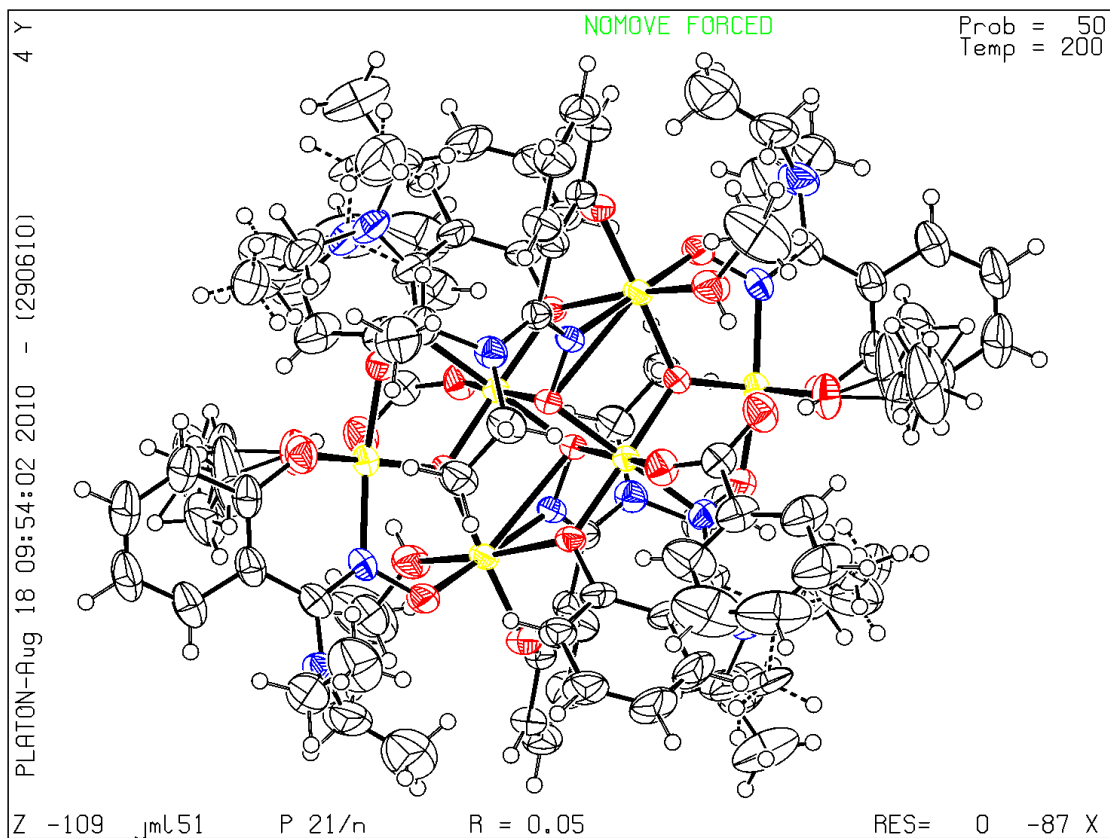

Supplement: mmc3 [file mmc3.pdf]
